# Supplementary material for: QSIM: quantitative structured illumination microscopy image processing in ImageJ
Source: PubMed Central journal article supplement (PMC4360942; doi:10.1186/1475-925x-14-4), 2015-01-14
Supplement: 12938_2014_934_MOESM1_ESM.pdf [file 12938_2014_934_MOESM1_ESM.pdf]

## Help File for QSIM

- a. Recommended environments for software operation:
  - Computer operating systems: Windows 7 or 8, Mac OS X, and Linux
  - ImageJ versions: 1.49m or newer
- b. Because of Java and ImageJ version differences, in order to run QSIM, users need to compile “QSIM\_.java” in ImageJ to generate a local “QSIM\_.class” file as instructed below:
  - (1) Drop “QSIM\_.java” file in the “plugins” folder of ImageJ.
  - (2) Open “QSIM\_.java” in imageJ.
  - (3) In the newly opened “QSIM\_.java” window, choose File → Compile and Run. This will generate a “QSIM\_.class” file in the same folder.
  - (4) Restart ImageJ. Choose Plugins → QSIM.
